# Supplementary material
Source: ML conference proceedings conference paper supplement (https://openreview.net/forum?id=2z8noau98f)
Supplement: supplementary_material [file attachment]

## Broader Impact

MISA framework provides a simple yet effective approach to policy learning from offline datasets. Although the results presented in this paper only consider simulated environments, given the generality of MISA, it could be potentially effective on learning real-robot policies in more complex environments. We should be cautious about the misuse of the method proposed. Depending on the specific application scenarios, it might be harmful to democratic privacy and safety.

## A Proofs and Derivations

### A.1 Proof for Theorem 4.1

We first show  $\mathcal{I}_{\text{MISA}}$ ,  $\mathcal{I}_{\text{MISA-DV}}$  and  $\mathcal{I}_{\text{MISA-}f}$  are lower bounds for mutual information  $I(S, A)$ .

Let  $\mu_{\theta, \phi}(a|s) \triangleq \frac{1}{\mathcal{Z}(s)} \pi_{\theta}(a|s) e^{T_{\phi}(s, a)}$ , where  $\mathcal{Z}(s) = \mathbb{E}_{\pi_{\theta}(a|s)}[e^{T_{\phi}(s, a)}]$ ,  $\mathcal{I}_{\text{MISA}}$  can be written as:

$$\begin{aligned} \mathcal{I}_{\text{MISA}} &\triangleq \mathbb{E}_{p(s, a)} \left[ \log \frac{\pi_{\theta}(a|s)}{p(a)} \right] + \mathbb{E}_{p(s, a)} [T_{\phi}(s, a)] - \mathbb{E}_{p(s)} \log \mathbb{E}_{\pi_{\theta}(a|s)} [e^{T_{\phi}(s, a)}] \\ &= \mathbb{E}_{p(s, a)} \left[ \log \frac{p(a|s)}{p(a)} \right] - \mathbb{E}_{p(s, a)} [\log p(a|s)] \\ &\quad + \mathbb{E}_{p(s, a)} [\log \pi_{\theta}(a|s)] + \mathbb{E}_{p(s, a)} [T_{\phi}(s, a)] - \mathbb{E}_{p(s)} [\log \mathcal{Z}(s)] \\ &= I(S, A) - \mathbb{E}_{p(s)} [D_{\text{KL}}(p(a|s) || \mu_{\theta, \phi}(a|s))] \leq I(S, A). \end{aligned} \quad (18)$$

The above inequality holds as the KL divergence is always non-negative.

Similarly, let  $\mu_{\theta, \phi}(s, a) \triangleq \frac{1}{\mathcal{Z}} p(s) \pi_{\theta}(a|s) e^{T_{\phi}(s, a)}$ , where  $\mathcal{Z}(s) = \mathbb{E}_{p(s) \pi_{\theta}(a|s)}[e^{T_{\phi}(s, a)}]$ ,  $\mathcal{I}_{\text{MISA-DV}}$  can be written as:

$$\begin{aligned} \mathcal{I}_{\text{MISA-DV}} &\triangleq \mathbb{E}_{p(s, a)} \left[ \log \frac{\pi_{\theta}(a|s)}{p(a)} \right] + \mathbb{E}_{p(s, a)} [T_{\phi}(s, a)] - \log \mathbb{E}_{p(s) \pi_{\theta}(a|s)} [e^{T_{\phi}(s, a)}] \\ &= \mathbb{E}_{p(s, a)} \left[ \log \frac{p(a|s)}{p(a)} \right] - \mathbb{E}_{p(s, a)} [\log p(a|s)] \\ &\quad + \mathbb{E}_{p(s, a)} [\log \pi_{\theta}(a|s)] + \mathbb{E}_{p(s, a)} [T_{\phi}(s, a)] - \log \mathcal{Z} \\ &= I(S, A) - D_{\text{KL}}(p(s, a) || \mu_{\theta, \phi}(s, a)) \leq I(S, A). \end{aligned} \quad (19)$$

The above inequality holds as the KL divergence is always non-negative.

Consider the generalized KL-divergence [10, 8] between two un-normalized distributions  $\tilde{p}(x)$  and  $\tilde{q}(x)$  defined by

$$D_{\text{GKL}}(\tilde{p}(x) || \tilde{q}(x)) = \int \tilde{p}(x) \log \frac{\tilde{p}(x)}{\tilde{q}(x)} - \tilde{p}(x) + \tilde{q}(x) dx, \quad (20)$$

which is always non-negative and reduces to KL divergence when  $\tilde{p}$  and  $\tilde{q}$  are normalized. Let  $\tilde{\mu}_{\theta, \phi}(a|s) \triangleq \pi_{\theta}(a|s) e^{T_{\phi}(s, a)-1}$  denote an un-normalized policy. We can rewrite  $\mathcal{I}_{\text{MISA-}f}$  as

$$\begin{aligned} \mathcal{I}_{\text{MISA-}f} &\triangleq \mathbb{E}_{p(s, a)} \left[ \log \frac{\pi_{\theta}(a|s)}{p(a)} \right] + \mathbb{E}_{p(s, a)} [T_{\phi}(s, a)] - \mathbb{E}_{p(s) \pi_{\theta}(a|s)} [e^{T_{\phi}(s, a)-1}] \\ &= \mathbb{E}_{p(s, a)} \left[ \log \frac{p(a|s)}{p(a)} \right] - \mathbb{E}_{p(s, a)} [\log p(a|s)] \\ &\quad + \mathbb{E}_{p(s, a)} [\log \pi_{\theta}(a|s)] + \mathbb{E}_{p(s, a)} [T_{\phi}(s, a) - 1] + 1 - \mathbb{E}_{p(s) \pi_{\theta}(a|s)} [e^{T_{\phi}(s, a)-1}] \\ &= I(S, A) - \mathbb{E}_{p(s)} [D_{\text{GKL}}(p(a|s) || \tilde{\mu}_{\theta, \phi}(a|s))] \leq I(S, A). \end{aligned} \quad (21)$$

478 So far, we have proven that  $\mathcal{I}_{\text{MISA}}$ ,  $\mathcal{I}_{\text{MISA-DV}}$  and  $\mathcal{I}_{\text{MISA-}f}$  mutual information lower bounds. Then we  
 479 are going to prove their relations by starting from the relation between  $\mathcal{I}_{\text{MISA}}$  and  $\mathcal{I}_{\text{MISA-DV}}$ .

$$\begin{aligned}
 \mathcal{I}_{\text{MISA}} - \mathcal{I}_{\text{MISA-DV}} &= D_{\text{KL}}(p(s, a) || \mu_{\theta, \phi}(s, a)) - \mathbb{E}_{p(s)} [D_{\text{KL}}(p(a|s) || \mu_{\theta, \phi}(a|s))] \\
 &= \mathbb{E}_{p(s)} \mathbb{E}_{p(a|s)} \left[ \log \frac{p(s, a)}{p(a|s)} - \log \frac{\mu_{\theta, \phi}(s, a)}{\mu_{\theta, \phi}(a|s)} \right] \\
 &= \mathbb{E}_{p(s)} \mathbb{E}_{p(a|s)} \left[ \log p(s) - \log \frac{1}{\mathcal{Z}} p(s) \mathcal{Z}(s) \right] \\
 &= \mathbb{E}_{p(s)} \left[ \log p(s) - \log \frac{1}{\mathcal{Z}} p(s) \mathcal{Z}(s) \right] \\
 &= D_{\text{KL}} \left( p(s) || \frac{1}{\mathcal{Z}} p(s) \mathcal{Z}(s) \right) \geq 0,
 \end{aligned} \tag{22}$$

480 where  $\frac{1}{\mathcal{Z}} p(s) \mathcal{Z}(s)$  is a self-normalized distribution as  $\mathcal{Z} = \mathbb{E}_{p(s)} [\mathcal{Z}(s)]$ . Therefore, we have  $\mathcal{I}_{\text{MISA}} \geq$   
 481  $\mathcal{I}_{\text{MISA-DV}}$ .

482 Similarly, the relation between  $\mathcal{I}_{\text{MISA-DV}}$  and  $\mathcal{I}_{\text{MISA-}f}$  is given by:

$$\begin{aligned}
 \mathcal{I}_{\text{MISA-DV}} - \mathcal{I}_{\text{MISA-}f} &= \mathbb{E}_{p(s)} [D_{\text{GKL}}(p(a|s) || \tilde{\mu}_{\theta, \phi}(a|s))] - D_{\text{KL}}(p(s, a) || \mu_{\theta, \phi}(s, a)) \\
 &= \mathbb{E}_{p(s)} \mathbb{E}_{p(a|s)} \left[ \log \frac{p(a|s)}{p(s, a)} - \log \frac{\tilde{\mu}_{\theta, \phi}(a|s)}{\mu_{\theta, \phi}(s, a)} \right] - 1 + \mathbb{E}_{p(s)} \mathbb{E}_{\pi_{\theta}(a|s)} [e^{T_{\phi}(s, a) - 1}] \\
 &= \mathbb{E}_{p(s)} \mathbb{E}_{p(a|s)} \left[ -\log p(s) - \log \frac{\tilde{\mu}_{\theta, \phi}(a|s)}{\mu_{\theta, \phi}(s, a)} \right] - 1 + \mathbb{E}_{p(s)} \mathbb{E}_{\pi_{\theta}(a|s)} [e^{T_{\phi}(s, a) - 1}] \\
 &= \mathbb{E}_{p(s)} \mathbb{E}_{p(a|s)} \left[ \log \frac{\mu_{\theta, \phi}(s, a)}{p(s) \tilde{\mu}_{\theta, \phi}(a|s)} \right] - \mathbb{E}_{\mu_{\theta, \phi}(s, a)} [1] + \mathbb{E}_{p(s)} \mathbb{E}_{\pi_{\theta}(a|s)} [e^{T_{\phi}(s, a) - 1}] \\
 &= \mathbb{E}_{p(s, a)} \left[ \log \frac{e}{\mathcal{Z}} \right] - \mathbb{E}_{\mu_{\theta, \phi}(s, a)} [1] + \mathbb{E}_{p(s)} \mathbb{E}_{\pi_{\theta}(a|s)} [e^{T_{\phi}(s, a) - 1}] \\
 &= \mathbb{E}_{\mu_{\theta, \phi}(s, a)} \left[ \log \frac{e}{\mathcal{Z}} \right] - \mathbb{E}_{\mu_{\theta, \phi}(s, a)} [1] + \mathbb{E}_{p(s)} \mathbb{E}_{\pi_{\theta}(a|s)} [e^{T_{\phi}(s, a) - 1}] \\
 &= \mathbb{E}_{\mu_{\theta, \phi}(s, a)} \left[ \log \frac{\mu_{\theta, \phi}(s, a)}{p(s) \tilde{\mu}_{\theta, \phi}(a|s)} \right] - \mathbb{E}_{\mu_{\theta, \phi}(s, a)} [1] + \mathbb{E}_{p(s)} \mathbb{E}_{\pi_{\theta}(a|s)} [e^{T_{\phi}(s, a) - 1}] \\
 &= D_{\text{GKL}}(\mu_{\theta, \phi}(s, a) || p(s) \tilde{\mu}_{\theta, \phi}(a|s)) \geq 0,
 \end{aligned} \tag{23}$$

483 where  $p(s) \tilde{\mu}_{\theta, \phi}(a|s)$  is an unnormalized joint distribution. Therefore, we have  $I(S, A) \geq \mathcal{I}_{\text{MISA}} \geq$   
 484  $\mathcal{I}_{\text{MISA-DV}} \geq \mathcal{I}_{\text{MISA-}f}$ .

---

**Algorithm 1** Mutual Information Regularized Offline RL

---

**Input:** Initialize Q network  $Q_{\phi}$ , policy network  $\pi_{\theta}$ , dataset  $\mathcal{D}$ , hyperparameters  $\alpha_1$  and  $\alpha_2$ .

**for**  $t \in \{1, \dots, \text{MAX\_STEP}\}$  **do**

    Train the Q network by gradient descent with objective  $J_Q(\phi)$  in Eqn. [12](#):

$\phi := \phi - \eta_Q \nabla_{\phi} J_Q(\phi)$

    Improve policy network by gradient ascent with object  $J_{\pi}(\theta)$  in Eqn. [13](#):

$\theta := \theta + \eta_{\pi} \nabla_{\theta} \mathbb{E}_{s \sim \mathcal{D}, a \sim \pi_{\theta}(a|s)} [Q_{\phi}(s, a)] + \alpha_2 \nabla_{\theta} \mathcal{I}_{\text{MISA}}$

**end**

**Output:** The well-trained  $\pi_{\theta}$ .

---

## 485 A.2 Derivation of MISA Gradients

486 We detail how the unbiased gradient is derived in Sec. 4.3

$$\begin{aligned} \frac{\partial \mathcal{I}_{\text{MISA}}}{\partial \theta} &= \mathbb{E}_{s,a \sim D} \left[ \frac{\log \pi_{\theta}(a | s)}{\partial \theta} \right] - \mathbb{E}_{s \sim D} \left[ \frac{\partial \log \mathbb{E}_{\pi_{\theta}(a|s)} [e^{Q_{\phi}(s,a)}]}{\partial \theta} \right] \\ &= \mathbb{E}_{s,a \sim D} \left[ \frac{\log \pi_{\theta}(a | s)}{\partial \theta} \right] - \mathbb{E}_{s \sim D} \left[ \mathbb{E}_{\pi_{\theta}(a|s)} \left[ \frac{e^{Q_{\phi}(s,a)}}{\mathbb{E}_{\pi_{\theta}(a|s)} [e^{Q_{\phi}(s,a)}]} \frac{\log \pi_{\theta}(a | s)}{\partial \theta} \right] \right] \end{aligned} \quad (24)$$

$$= \mathbb{E}_{s,a \sim D} \left[ \frac{\log \pi_{\theta}(a | s)}{\partial \theta} \right] - \mathbb{E}_{s \sim D, a \sim p_{\theta, \phi}(a|s)} \left[ \frac{\log \pi_{\theta}(a | s)}{\partial \theta} \right] \quad (25)$$

487 for Eqn. 24, we use the log-derivative trick.

## 488 B Implementation Details

489 We follow the network architectures of CQL [23] and IQL [22], where a neural network of 3 encoding  
 490 layers of size 256 is used for antmaze-v0 environments, and 2 encoding layers for other tasks, followed  
 491 by an output layer. We use ELU activation function [11] and SAC [17] as the base RL algorithm.  
 492 Besides, we use a learning rate of  $1 \times 10^{-4}$  for both the policy network and Q-value network  
 493 with a cosine learning rate scheduler. When approximating  $\mathbb{E}_{\pi_{\theta}(a|s)} [e^{T_{\psi}(s,a)}]$ , we use 50 Monte-  
 494 Carlo samples. To sample from the non-parametric distribution  $p_{\theta, \phi}(a | s) = \frac{\pi_{\theta}(a|s)e^{Q_{\phi}(s,a)}}{\mathbb{E}_{\pi_{\theta}(a|s)} [e^{Q_{\phi}(s,a)}]}$ ,  
 495 we use Hamiltonian Monte Carlo algorithm. In addition, for unbiased gradient estimation with  
 496 MCMC samples, we use a burn-in steps of 5. For all tasks, we average the mean returns over 10  
 497 evaluation trajectories and 5 random seeds. In particular, following [22], we evaluate the antmaze-  
 498 v0 environments for 100 episodes instead. To stabilize the training of our agents in antmaze-v0  
 499 environments, we follow [23] and normalize the reward by  $r' = (r - 0.5) * 4$ . As MCMC sampling is  
 500 slow, we trade-off its accuracy with efficiency by choosing moderately small iteration configurations.  
 501 We set the MCMC burn-in steps to 5, number of leapfrog steps to 2, and MCMC step size to 1.

502 For practical implementations, we follow the CQL-Lagrange [23] implementation by constraining  
 503 the Q-value update by a “budget” variable  $\tau$  and rewrite Eqn. 12 as

$$\min_Q \max_{\gamma_1 \geq 0} \gamma_1 (\mathbb{E}_{s \sim D} [\log \mathbb{E}_{\pi_{\theta}(a|s)} [e^{Q_{\phi}(s,a)}]] - \mathbb{E}_{s,a \sim D} [Q_{\phi}(s,a)] - \tau) - J_Q^{\mathcal{B}}(\phi). \quad (26)$$

504 Eqn. 26 implies that if the expected value of Q-value difference is less than the threshold  $\tau$ ,  $\gamma_1$  will  
 505 adjust to close to 0; if the Q-value difference is higher than the threshold  $\tau$ ,  $\gamma_1$  will be larger and  
 506 penalize Q-values harder. We set  $\tau = 10$  for antmaze-v0 environments and  $\tau = 3$  for adroit-v0  
 507 and kitchen-v0 environments. For gym-locomotion-v2 tasks, we disable this function and direction  
 508 optimize Eqn. 12, because these tasks have a relatively short horizon and dense reward, and further  
 509 constraining the Q values is less necessary. Our code is implemented in JAX [7] with Flax [19]. All  
 510 experiments are conducted on NVIDIA 3090 GPUs.
